# Supplementary material for: Role of METTL20 in regulating β-oxidation and heat production in mice under fasting or ketogenic conditions
Source: PubMed Central journal article supplement (PMC5775328; doi:10.1038/s41598-018-19615-4), 2018-01-19
Supplement: 41598_2018_19615_MOESM1_ESM.pdf [file 41598_2018_19615_MOESM1_ESM.pdf]

Supplementary Information

**Role of METTL20 in regulating beta-oxidation and heat production in mice under fasting  
or ketogenic conditions**

Tadahiro Shimazu<sup>1</sup>, Tamio Furuse<sup>2</sup>, Shabeesh Balan<sup>3</sup>, Ikuko Yamada<sup>2</sup>, Shuzo Okuno<sup>4</sup>, Hiroko Iwanari<sup>5</sup>, Takehiro Suzuki<sup>6</sup>, Takao Hamakubo<sup>5</sup>, Naoshi Dohmae<sup>6</sup>, Takeo Yoshikawa<sup>3</sup>, Shigeharu Wakana<sup>2</sup>, Yoichi Shinkai<sup>1§</sup>

<sup>1</sup>Cellular Memory Laboratory, RIKEN, 2-1 Hirosawa, Wako, Saitama 351-0198, Japan.

<sup>2</sup>Japan Mouse Clinic, RIKEN BRC, 3-1-1 Koyadai, Tsukuba, Ibaraki 305-0074, Japan.

<sup>3</sup>Laboratory for Molecular Psychiatry, RIKEN Brain Science Institute, Wako, Saitama 351-0198,

Japan. <sup>4</sup>Graduate School of Biostudies, Kyoto University, Kyoto, Kyoto 606-8507, Japan.

<sup>5</sup>Department of Quantitative Biology and Medicine, Research Center for Advanced Science and

Technology, The University of Tokyo, 4-6-1 Komaba, Meguro-ku, Tokyo 153-8904, Japan.

<sup>6</sup>Biomolecular Characterization Unit, Center for Sustainable Resource Science, RIKEN, Wako,

Saitama 351-0198, Japan

**Table S1**

Homozygote mutation in the ExAC database.

| Chrom | Position | RSID        | Reference | Alternate | Consequence | Protein Consequence | Transcript Consequence | Annotation   | Allele Count | Allele Number | Number of Homozygotes | Allele Frequency |
|-------|----------|-------------|-----------|-----------|-------------|---------------------|------------------------|--------------|--------------|---------------|-----------------------|------------------|
| 12    | 31814952 | rs138402033 | G         | A         | p.Arg22Gln  | p.Arg22Gln          | c.65G>A                | missense     | 31           | 121408        | 1                     | 2.55E-04         |
| 12    | 31815167 | rs61736289  | G         | T         | p.Ala94Ser  | p.Ala94Ser          | c.280G>T               | missense     | 4521         | 121018        | 102                   | 3.74E-02         |
| 12    | 31815202 | rs138229541 | G         | A         | c.314+1G>A  |                     | c.314+1G>A             | splice donor | 465          | 119920        | 6                     | 3.88E-03         |
| 12    | 31820653 | .           | T         | G         | p.Ile173Ser | p.Ile173Ser         | c.518T>G               | missense     | 5            | 121186        | 1                     | 4.13E-05         |
| 12    | 31820697 | rs143179970 | G         | A         | p.Asp188Asn | p.Asp188Asn         | c.562G>A               | missense     | 15           | 121324        | 1                     | 1.24E-04         |
| 12    | 31820752 | .           | G         | A         | p.Cys206Tyr | p.Cys206Tyr         | c.617G>A               | missense     | 10           | 121384        | 1                     | 8.24E-05         |
| 12    | 31820796 | rs151164668 | C         | T         | p.Arg221Trp | p.Arg221Trp         | c.661C>T               | missense     | 38           | 121398        | 1                     | 3.13E-04         |
| 12    | 31820856 | rs115438422 | C         | T         | p.Leu241Phe | p.Leu241Phe         | c.721C>T               | missense     | 381          | 121384        | 5                     | 3.14E-03         |

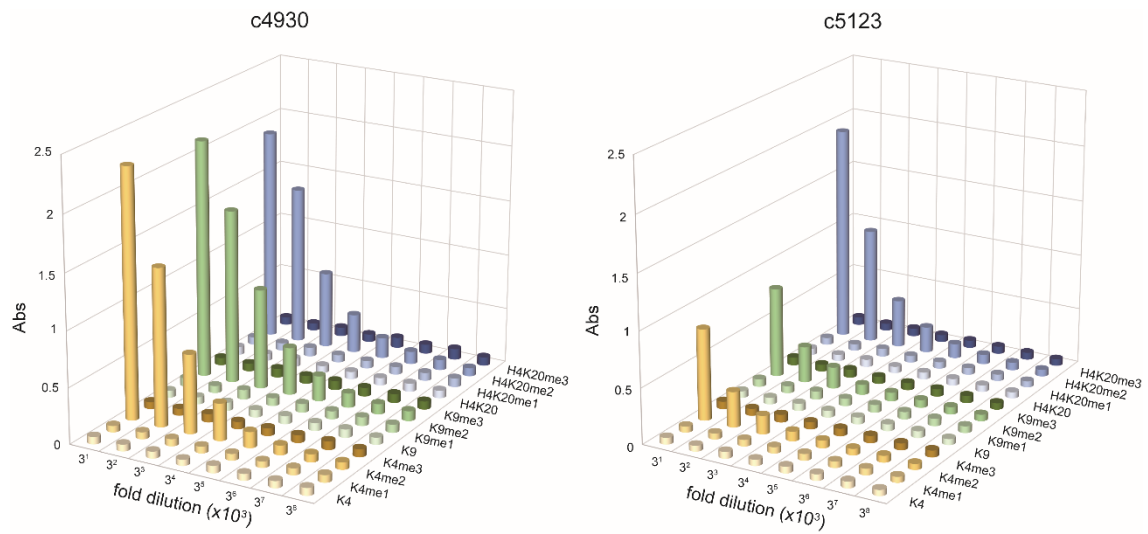

**Figure S1. Validation of monoclonal anti-diMeLys antibodies, c4930 and c5123**

The specificity of two monoclonal antibodies (c4930 and c5123) was analyzed by ELISA using histone H3 and H4 peptides (H3K4: ARTKQTARKSTGC, H3K9: ARTKQTARKSTGGKAPRKQC, H4K20: GKGGAKRHRKVLRDNIQGIC) containing different modifications. Methylated K is underlined. Microtiter plates coated with the peptides (indicated on the right) were incubated with 3-fold dilutions of each antibody (starting from 1:3000 dilution). After incubation with peroxidase-conjugated secondary antibody and washing, the colorimetric signal of tetramethylbenzidine was detected by measuring the absorbance at 405 nm (Abs) using a plate reader.

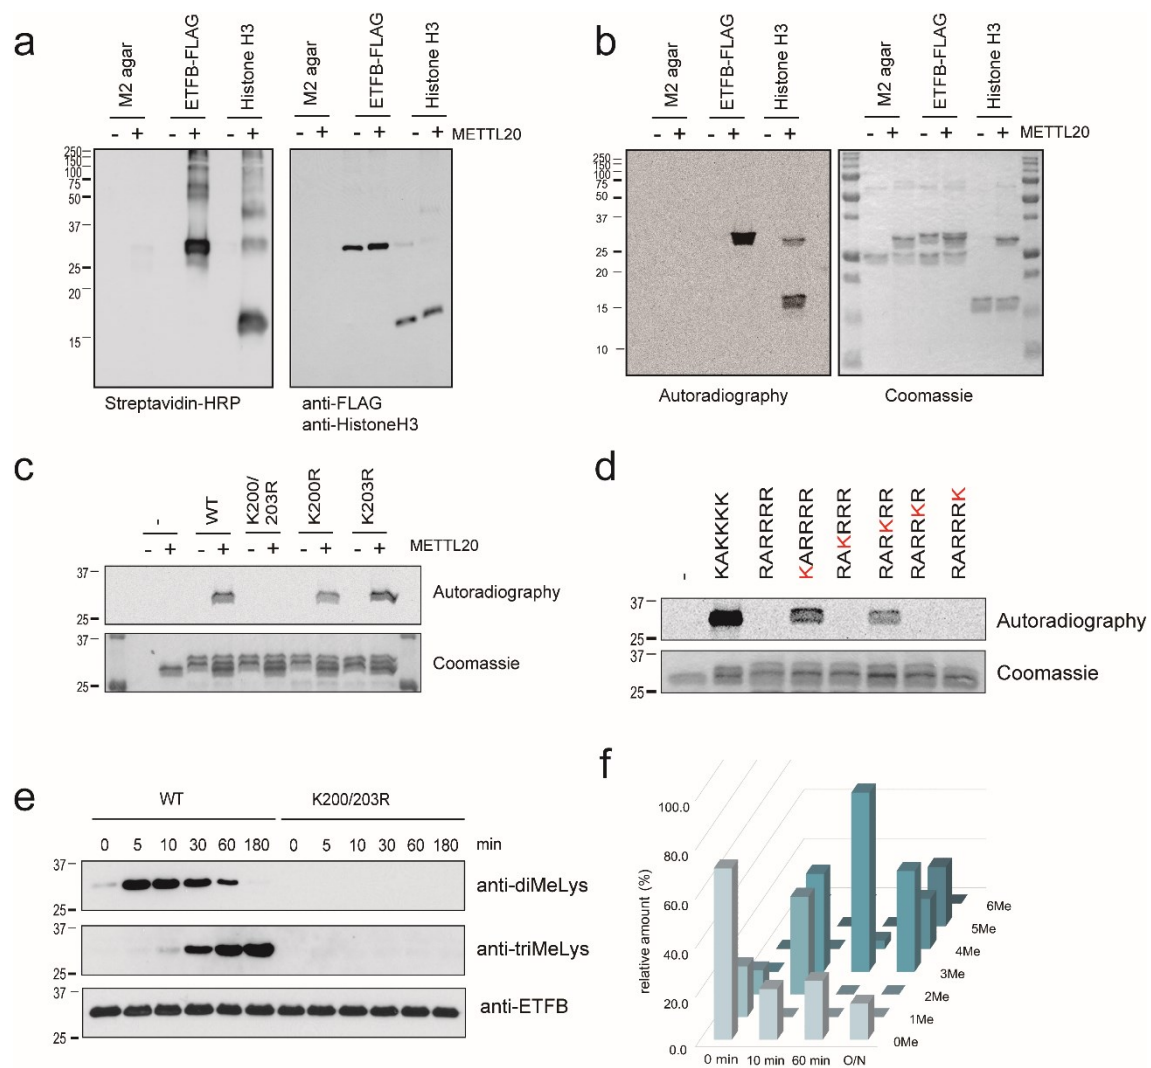

**Figure S2. Identification of ETFB as a METTL20 Substrate in mitochondria**

(a) FLAG-tagged ETFB or recombinant Histone H3 were incubated with or without His-METTL20 in the presence of ProSeAM for 2 h at 20°C. Modified proteins were biotinylated and detected with streptavidin-HRP (left) or anti-FLAG antibody and anti-Histone H3 antibody for the loading control (right).

(b) FLAG-tagged ETFB were incubated with or without His-METTL20 in the presence of 14C-

labeled AdoMet. Proteins were separated with SDS-PAGE and stained with Coomassie blue (right), the autoradiography was detected with the image analyzer BAS-5000 (left).

(c) Recombinant ETF complex (ETF<sub>A</sub> WT/ ETF<sub>B</sub> K200/203R) and His-METTTL20 were incubated with <sup>14</sup>C-labeled AdoMet for 2 h at 30°C. The autoradiography was detected as in E.

(d) Indicated FLAG-tagged ETF<sub>B</sub> mutants were incubated with His-METTTL20 in the presence of <sup>14</sup>C-labeled AdoMet for 2 h at 30°C. The autoradiography was detected as in E.

(e) Recombinant ETF complex and His-METTTL20 were incubated with AdoMet for 0 - 180 min at 30°C. The reaction was stopped by adding Laemmli SDS-sample buffer. ETF<sub>B</sub> were separated with SDS-PAGE, and their methylation were detected with anti-triMeLys antibodies (top), anti-diMeLys antibodies (middle), and anti-ETF<sub>B</sub> antibodies (bottom, as loading control).

(f) Recombinant ETF complex were incubated with His-METTTL20 in the presence of AdoMet for indicated time. After the reaction, ETF<sub>B</sub> were separated with SDS-PAGE, digested with Asp-N, and methylation of peptides containing K200/203 were analyzed with MALDI-TOF-MS. Relative amount of methylation in ETF<sub>B</sub> were calculated from the intensity of peptides with 0 to 6 methyl-group.

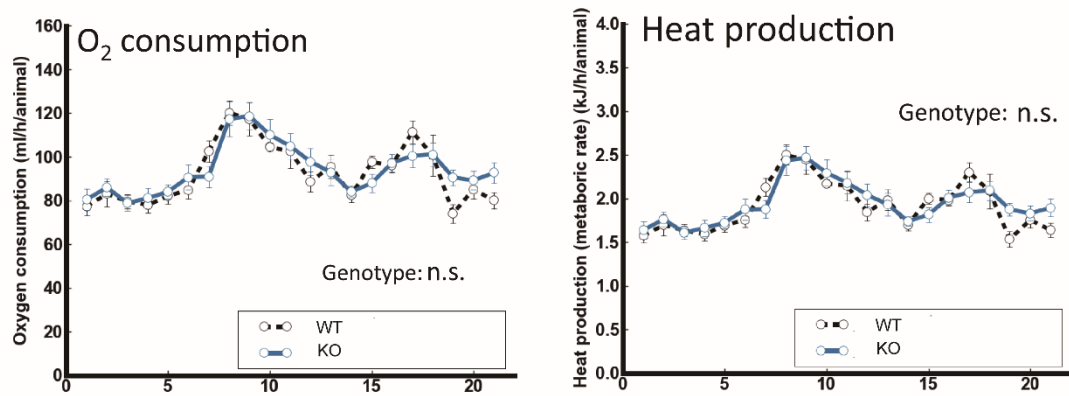

**Figure S3. Calorimetric analysis of Mettl20 KO mice under normal diet (ND)**

Calorimetric analysis of Mettl20 KO mice fed with ND. ANOVA, effect of genotype, ns; not significant. N = 10 male mice for each genotype at 12 weeks of age.
